# Supplementary material
Source: MDPI journal article supplement (https://www.mdpi.com/2071-1050/14/21/14222)
Supplement: s1 [file s1]

Article

# Forest Aboveground Biomass Estimation and Response to Climate Change based on Remote Sensing Data

Yingchang Li <sup>1</sup>, Mingyang Li <sup>2,\*</sup>, and Yuehui Wang <sup>3</sup>

<sup>1</sup> School of History and Culture, Shanxi University, Taiyuan 030006, China

<sup>2</sup> College of Forestry, Nanjing Forestry University, Nanjing 210037, China

<sup>3</sup> Department of Engineering Foundation, Army Academy of Border and Coastal Defence, Xi'an 710108, China

\* Correspondence: lmy196727@njfu.edu.cn; Tel.: +86-025-8542-7327

## Supplementary Information

**Table S1.** Description of Landsat data (1999–2014) downloaded and used in this study.

| 1999 | P/R | P124        | P123        | P122        | 2004 | P124        | P123        | P122        |
|------|-----|-------------|-------------|-------------|------|-------------|-------------|-------------|
|      | R40 | L5-19981001 | L5-19990911 |             |      | L5-20040915 | L5-20040924 |             |
|      |     | L7-19991113 | L5-19990927 |             |      | L5-20041102 |             |             |
|      |     | L7-19990910 | L5-20000913 |             |      | L5-20041118 |             |             |
|      | R41 | L5-19991020 | L5-19990911 |             |      | L5-20031015 | L5-20040924 |             |
|      |     | L5-19981001 | L5-19990927 |             |      | L5-20040915 |             |             |
|      |     | L7-19990910 | L5-20000913 |             |      | L5-20041118 |             |             |
|      | R42 | L5-19981001 | L5-19980924 | L7-20000914 |      | L5-20031015 | L5-20040924 | L5-20031120 |
|      |     |             | L5-19981111 |             |      | L5-20040915 |             | L5-20041003 |
|      |     |             | L5-19990911 |             |      | L5-20041118 |             | L5-20041120 |
|      | R43 | L5-19981001 | L5-19980924 |             |      | L5-20031015 | L5-20040924 |             |
|      |     | L5-19981017 | L5-19981111 |             |      | L5-20040915 | L5-20041010 |             |
|      |     | L7-19990926 | L7-19991122 |             |      | L5-20041017 | L5-20050911 |             |
| 2009 | R40 | L5-20081129 | L5-20080919 |             | 2014 | L8-20131010 | L8-20130917 |             |
|      |     | L5-20091015 | L5-20090906 |             |      | L8-20141114 | L8-20141006 |             |
|      |     | L5-20100916 | L5-20091024 |             |      | L8-20151016 | L8-20151025 |             |
|      | R41 | L5-20091015 | L5-20090906 |             |      | L8-20131010 | L8-20130917 |             |
|      |     | L5-20091031 | L5-20091024 |             |      | L8-20131026 | L8-20131014 |             |
|      |     | L5-20100916 | L5-20101112 |             |      | L8-20140927 | L8-20151025 |             |
|      | R42 | L5-20081028 | L5-20080919 | L5-20091017 |      | L8-20131026 | L8-20130917 | L8-20131012 |
|      |     | L5-20081113 | L5-20091024 | L5-20101004 |      | L8-20141114 |             | L8-20131129 |
|      |     | L5-20091031 | L5-20091125 |             |      | L8-20151016 |             | L8-20141015 |
|      | R43 | L5-20081028 | L5-20091125 |             |      | L8-20131026 | L8-20130917 |             |
|      |     | L5-20091031 |             |             |      | L8-20151016 | L8-20131014 |             |
|      |     | L5-20101119 |             |             |      |             | L8-20141006 |             |

Note: P, Path; R, Row; L5, Landsat 5 TM; L7, Landsat 7 ETM+; L8, Landsat 8 OLI.

**Table S2.** The equations of the vegetation indices used in this study.

| No. | Variable Name                                | Equation                                                                                                                                               | Reference |
|-----|----------------------------------------------|--------------------------------------------------------------------------------------------------------------------------------------------------------|-----------|
| 1   | Atmospherically Resistant Vegetation Index   | $ARVI = \frac{NIR - [Red - (Blue - Red)]}{NIR + [Red - (Blue - Red)]}$                                                                                 | [1]       |
| 2   | Difference Vegetation Index                  | $DVI = NIR - Red$                                                                                                                                      | [2]       |
| 3   | Enhanced Vegetation Index                    | $EVI = 2.5 \times \frac{(NIR - Red)}{(NIR + 6 \times Red - 7.5 \times Blue + 1)}$                                                                      | [3]       |
| 4   | Green Atmospherically Resistant Index        | $GARI = \frac{NIR - [Green - 1.7 \times (Blue - Red)]}{NIR + [Green - 1.7 \times (Blue - Red)]}$                                                       | [4]       |
| 5   | Green Difference Vegetation Index            | $GDVI = NIR - Green$                                                                                                                                   | [5]       |
| 6   | Green Normalized Difference Vegetation Index | $GNDVI = \frac{(NIR - Green)}{(NIR + Green)}$                                                                                                          | [6]       |
| 7   | Green Ratio Vegetation Index                 | $GRVI = \frac{NIR}{Green}$                                                                                                                             | [5]       |
| 8   | Green Vegetation Index                       | $GVI = (-0.2848 \times Blue) + (-0.2435 \times Green) + (-0.5436 \times Red) + (0.7243 \times NIR) + (0.0840 \times SWIR_1) + (-0.1800 \times SWIR_2)$ | [7]       |
| 9   | Infrared Percentage Vegetation Index         | $IPVI = \frac{NIR}{NIR + Red}$                                                                                                                         | [8]       |
| 10  | Leaf Area Index                              | $LAI = (3.618 \times EVI - 0.118)$                                                                                                                     | [9]       |
| 11  | Modified Non-Linear Vegetation Index         | $MNLVI = \frac{(NIR^2 - Red) \times (1 + 0.5)}{(NIR^2 + Red + 0.5)}$                                                                                   | [10]      |
| 12  | Modified Simple Ratio Vegetation Index       | $MSRVI = \frac{\left(\frac{NIR}{Red}\right) - 1}{\left(\sqrt{\frac{NIR}{Red}}\right) + 1}$                                                             | [11]      |
| 13  | Normalized Difference Vegetation Index       | $NDVI = \frac{(NIR - Red)}{(NIR + Red)}$                                                                                                               | [12]      |
| 14  | Non-Linear Vegetation Index                  | $NLVI = \frac{(NIR^2 - Red)}{(NIR^2 + Red)}$                                                                                                           | [13]      |
| 15  | Optimized Soil Adjusted Vegetation Index     | $OSAVI = \frac{1.5 \times (NIR - Red)}{(NIR + Red + 0.16)}$                                                                                            | [14]      |
| 16  | Renormalized Difference Vegetation Index     | $RDVI = \frac{(NIR - Red)}{\sqrt{(NIR + Red)}}$                                                                                                        | [14]      |
| 17  | Ratio Vegetation Index                       | $RVI = \frac{NIR}{Red}$                                                                                                                                | [15]      |

|    |                                         |                                                           |      |
|----|-----------------------------------------|-----------------------------------------------------------|------|
| 18 | Soil Adjusted Vegetation Index          | $SAVI = \frac{1.5 \times (NIR - Red)}{(NIR + Red + 0.5)}$ | [16] |
| 19 | Transformed Difference Vegetation Index | $TDVI = \sqrt{0.5 + \frac{(NIR - Red)}{(NIR + Red)}}$     | [17] |
| 20 | Visible Atmospherically Resistant Index | $VARI = \frac{Green - Red}{Green + Red - Blue}$           | [18] |

**Table S3.** Evaluation criteria of the semivariance analysis and Ordinary Kriging.

| No. | Evaluation Criteria                 | Equation                                                                                        | Reference |
|-----|-------------------------------------|-------------------------------------------------------------------------------------------------|-----------|
| 1   | Residual Sums of square             | $RSS = \sum_{i=1}^n (s_i - \hat{s}_i)^2$                                                        | [19]      |
| 2   | Mean Error                          | $ME = \frac{\sum_{i=1}^n (v_i - \hat{v}_i)}{n}$                                                 | [20]      |
| 3   | Mean Standardized Error             | $MSE = \frac{\sum_{i=1}^n \frac{(\hat{v}_i - v_i)}{\hat{\sigma}_i}}{n}$                         | [20]      |
| 4   | Root-mean-Square Standardized Error | $RMSSE = \sqrt{\frac{\sum_{i=1}^n \left( \frac{\hat{v}_i - v_i}{\hat{\sigma}_i} \right)^2}{n}}$ | [20]      |
| 5   | Average Standard Error              | $ASE = \sqrt{\frac{\sum_{i=1}^n \hat{\sigma}_i^2}{n}}$                                          | [20]      |
| 6   | Total Error                         | $TE =  ME  +  MSE  +  RMSE  +   ASE  -  RMSE   +  1 -  RMSSE  $                                 | [20]      |

**Table S4.** Evaluation of semivariance analysis with different semivariogram models of XGBoost model.

| Year | Forest Type | Model              | Nugget       | Sill          | Range (m)        | RSS             | R <sup>2</sup> | Nugget Effect |
|------|-------------|--------------------|--------------|---------------|------------------|-----------------|----------------|---------------|
| 1999 | All         | Linear             | 799.74       | 1070.26       | 241916.80        | 15300.00        | 0.96           | 0.75          |
|      |             | <b>Spherical</b>   | <b>70.00</b> | <b>859.00</b> | <b>189050.00</b> | <b>16765.00</b> | <b>0.88</b>    | <b>0.08</b>   |
|      |             | Exponential        | 162.00       | 901.00        | 183300.00        | 17700.00        | 0.65           | 0.18          |
|      |             | Gaussian           | 120.00       | 1165.00       | 164540.48        | 40960.00        | 0.10           | 0.10          |
|      | Broadleaved | Linear             | 833.77       | 1095.31       | 243116.83        | 11561.00        | 0.92           | 0.76          |
|      |             | <b>Spherical</b>   | <b>71.00</b> | <b>843.00</b> | <b>173850.00</b> | <b>12013.00</b> | <b>0.90</b>    | <b>0.08</b>   |
|      |             | Exponential        | 111.00       | 1227.00       | 159000.00        | 22890.00        | 0.56           | 0.09          |
|      |             | Gaussian           | 80.00        | 1225.00       | 124700.00        | 43137.00        | 0.15           | 0.07          |
|      | Coniferous  | Linear             | 862.00       | 1150.74       | 244385.00        | 12642.00        | 0.88           | 0.75          |
|      |             | Spherical          | 121.00       | 1019.00       | 120900.00        | 15825.00        | 0.71           | 0.12          |
|      |             | <b>Exponential</b> | <b>37.00</b> | <b>414.00</b> | <b>156750.00</b> | <b>13829.00</b> | <b>0.86</b>    | <b>0.09</b>   |
|      |             | Gaussian           | 129.00       | 1269.00       | 103092.00        | 39795.00        | 0.11           | 0.10          |

|      |             |                    |              |                |                  |                 |             |             |
|------|-------------|--------------------|--------------|----------------|------------------|-----------------|-------------|-------------|
| 2004 | Mixed       | Linear             | 941.00       | 1232.43        | 244314.97        | 34996.00        | 0.78        | 0.76        |
|      |             | Spherical          | 141.00       | 1047.00        | 195000.00        | 39648.00        | 0.61        | 0.13        |
|      |             | <b>Exponential</b> | <b>49.00</b> | <b>1101.00</b> | <b>178601.00</b> | <b>35734.00</b> | <b>0.73</b> | <b>0.04</b> |
|      |             | Gaussian           | 161.00       | 1346.00        | 196909.00        | 49705.00        | 0.10        | 0.12        |
|      | All         | Linear             | 974.64       | 1163.11        | 244277.59        | 18542.00        | 0.90        | 0.84        |
|      |             | <b>Spherical</b>   | <b>89.00</b> | <b>1208.00</b> | <b>185538.00</b> | <b>19561.00</b> | <b>0.85</b> | <b>0.07</b> |
|      |             | Exponential        | 144.00       | 1223.20        | 214100.00        | 23526.00        | 0.69        | 0.12        |
|      |             | Gaussian           | 154.00       | 1423.10        | 202470.77        | 33558.00        | 0.09        | 0.11        |
|      | Broadleaved | Linear             | 859.82       | 966.04         | 242024.81        | 16151.00        | 0.96        | 0.89        |
|      |             | Spherical          | 155.00       | 1316.60        | 113400.00        | 18171.00        | 0.83        | 0.12        |
|      |             | <b>Exponential</b> | <b>84.00</b> | <b>1015.00</b> | <b>143117.00</b> | <b>16851.00</b> | <b>0.92</b> | <b>0.08</b> |
|      |             | Gaussian           | 161.00       | 1516.60        | 111085.00        | 31171.00        | 0.13        | 0.11        |
|      | Coniferous  | Linear             | 990.57       | 1137.97        | 244321.73        | 17835.00        | 0.93        | 0.87        |
|      |             | Spherical          | 124.00       | 1216.20        | 112600.00        | 19530.00        | 0.62        | 0.10        |
|      |             | <b>Exponential</b> | <b>60.00</b> | <b>566.00</b>  | <b>122025.00</b> | <b>18772.00</b> | <b>0.89</b> | <b>0.11</b> |
|      |             | Gaussian           | 153.00       | 1616.30        | 193000.00        | 21540.00        | 0.12        | 0.09        |
|      | Mixed       | Linear             | 905.83       | 1242.88        | 240979.13        | 34094.00        | 0.81        | 0.73        |
|      |             | <b>Spherical</b>   | <b>52.00</b> | <b>659.00</b>  | <b>166552.00</b> | <b>37345.00</b> | <b>0.77</b> | <b>0.08</b> |
|      |             | Exponential        | 123.00       | 1625.40        | 151800.00        | 37867.00        | 0.65        | 0.08        |
|      |             | Gaussian           | 155.00       | 1225.50        | 177200.00        | 42869.00        | 0.16        | 0.13        |
| 2009 | All         | Linear             | 900.88       | 1037.32        | 244362.74        | 15034.00        | 0.91        | 0.87        |
|      |             | <b>Spherical</b>   | <b>98.00</b> | <b>1042.00</b> | <b>165555.00</b> | <b>16642.00</b> | <b>0.87</b> | <b>0.09</b> |
|      |             | Exponential        | 123.00       | 1621.60        | 136200.00        | 16055.00        | 0.74        | 0.08        |
|      |             | Gaussian           | 154.00       | 1121.50        | 140500.00        | 39108.00        | 0.14        | 0.14        |
|      | Broadleaved | Linear             | 928.34       | 1159.35        | 233417.93        | 11531.00        | 0.92        | 0.80        |
|      |             | <b>Spherical</b>   | <b>63.00</b> | <b>951.00</b>  | <b>184385.00</b> | <b>12207.00</b> | <b>0.88</b> | <b>0.07</b> |
|      |             | Exponential        | 187.00       | 1297.70        | 127050.00        | 14064.00        | 0.81        | 0.14        |
|      |             | Gaussian           | 159.00       | 1397.00        | 102700.00        | 35040.00        | 0.10        | 0.11        |
|      | Coniferous  | Linear             | 856.30       | 1003.71        | 132220.21        | 17183.00        | 0.93        | 0.85        |
|      |             | Spherical          | 103.00       | 996.00         | 121800.00        | 19603.00        | 0.75        | 0.10        |
|      |             | <b>Exponential</b> | <b>51.00</b> | <b>638.00</b>  | <b>134322.00</b> | <b>18835.00</b> | <b>0.85</b> | <b>0.08</b> |
|      |             | Gaussian           | 93.00        | 856.00         | 148532.94        | 34876.00        | 0.15        | 0.11        |
|      | Mixed       | Linear             | 858.84       | 1040.51        | 233630.11        | 27742.00        | 0.86        | 0.83        |
|      |             | <b>Spherical</b>   | <b>84.00</b> | <b>1167.00</b> | <b>133768.00</b> | <b>32514.00</b> | <b>0.78</b> | <b>0.07</b> |
|      |             | Exponential        | 17.00        | 818.80         | 191900.00        | 35046.00        | 0.66        | 0.02        |
|      |             | Gaussian           | 123.00       | 928.90         | 161281.28        | 41855.00        | 0.17        | 0.13        |
| 2014 | All         | Linear             | 932.79       | 1166.55        | 226552.05        | 14772.00        | 0.87        | 0.80        |
|      |             | <b>Spherical</b>   | <b>77.00</b> | <b>967.00</b>  | <b>173138.00</b> | <b>15996.00</b> | <b>0.82</b> | <b>0.08</b> |
|      |             | Exponential        | 127.00       | 1126.00        | 184000.00        | 16189.00        | 0.64        | 0.11        |
|      |             | Gaussian           | 110.00       | 823.00         | 201300.00        | 30469.00        | 0.12        | 0.13        |
|      | Broadleaved | Linear             | 775.47       | 967.21         | 138137.75        | 10011.00        | 0.92        | 0.80        |
|      |             | Spherical          | 121.00       | 877.00         | 121800.00        | 11688.00        | 0.77        | 0.14        |
|      |             | <b>Exponential</b> | <b>51.00</b> | <b>892.00</b>  | <b>144315.00</b> | <b>10711.00</b> | <b>0.88</b> | <b>0.06</b> |
|      |             | Gaussian           | 90.00        | 877.00         | 133920.30        | 38688.00        | 0.12        | 0.10        |
|      | Coniferous  | Linear             | 967.87       | 1141.50        | 135555.04        | 14014.00        | 0.84        | 0.85        |
|      |             | Spherical          | 124.00       | 1058.00        | 139080.00        | 15423.00        | 0.70        | 0.12        |
|      |             | <b>Exponential</b> | <b>66.00</b> | <b>743.00</b>  | <b>130979.00</b> | <b>14094.00</b> | <b>0.81</b> | <b>0.09</b> |
|      |             | Gaussian           | 71.00        | 1058.00        | 140900.00        | 37423.00        | 0.13        | 0.07        |
|      | Mixed       | Linear             | 928.61       | 1208.23        | 145538.42        | 37345.00        | 0.83        | 0.77        |

|                    |              |               |                  |                 |             |             |
|--------------------|--------------|---------------|------------------|-----------------|-------------|-------------|
| Spherical          | 116.00       | 1122.00       | 141900.00        | 39476.00        | 0.60        | 0.10        |
| <b>Exponential</b> | <b>74.00</b> | <b>902.00</b> | <b>153418.00</b> | <b>38531.00</b> | <b>0.75</b> | <b>0.08</b> |
| Gaussian           | 143.00       | 1122.00       | 149006.66        | 42946.00        | 0.10        | 0.13        |

Note: Results of all forest plots with no classification of forest type are abbreviated as “All”. The bold type in the table is the best model and parameter. RSS: Residual sums of squares for regression of actual and modeled semivariance values.

**Table S5.** Evaluation of cross validation of Ordinary Kriging interpolation with different forest types of XGBoost models.

| Year | Forest Type | Model              | ME           | MSE          | RMSE          | ASE           | RMSSE        | TE            |
|------|-------------|--------------------|--------------|--------------|---------------|---------------|--------------|---------------|
| 1999 | All         | Linear             | 0.119        | 0.004        | 29.976        | 27.270        | 1.102        | 32.907        |
|      |             | <b>Spherical</b>   | <b>0.052</b> | <b>0.002</b> | <b>29.682</b> | <b>27.005</b> | <b>1.098</b> | <b>32.512</b> |
|      |             | Exponential        | 0.131        | 0.004        | 30.125        | 27.600        | 1.104        | 32.888        |
|      |             | Gaussian           | 0.157        | 0.005        | 30.194        | 27.815        | 1.101        | 32.836        |
|      | Broadleaved | Linear             | 0.123        | 0.004        | 27.572        | 26.993        | 1.099        | 28.377        |
|      |             | <b>Spherical</b>   | <b>0.043</b> | <b>0.001</b> | <b>26.790</b> | <b>25.799</b> | <b>1.092</b> | <b>27.917</b> |
|      |             | Exponential        | 0.185        | 0.005        | 27.459        | 26.488        | 1.124        | 28.744        |
|      |             | Gaussian           | 0.203        | 0.006        | 27.443        | 26.724        | 1.151        | 28.521        |
|      | Coniferous  | Linear             | 0.033        | 0.011        | 28.728        | 27.588        | 0.996        | 29.916        |
|      |             | Spherical          | 0.008        | 0.010        | 28.979        | 27.752        | 1.000        | 30.225        |
|      |             | <b>Exponential</b> | <b>0.118</b> | <b>0.004</b> | <b>28.345</b> | <b>27.022</b> | <b>1.047</b> | <b>29.837</b> |
|      |             | Gaussian           | 0.065        | 0.007        | 28.885        | 27.673        | 0.999        | 30.171        |
|      | Mixed       | Linear             | 0.330        | 0.012        | 28.989        | 26.895        | 1.109        | 31.534        |
|      |             | Spherical          | 0.412        | 0.015        | 28.824        | 27.139        | 1.094        | 31.029        |
|      |             | <b>Exponential</b> | <b>0.009</b> | <b>0.005</b> | <b>28.460</b> | <b>26.026</b> | <b>1.074</b> | <b>30.981</b> |
|      |             | Gaussian           | 0.410        | 0.014        | 28.895        | 27.199        | 1.095        | 31.111        |
| 2004 | All         | Linear             | 0.157        | 0.005        | 29.194        | 26.815        | 1.011        | 31.746        |
|      |             | <b>Spherical</b>   | <b>0.069</b> | <b>0.003</b> | <b>28.530</b> | <b>26.598</b> | <b>1.007</b> | <b>30.541</b> |
|      |             | Exponential        | 0.075        | 0.003        | 29.714        | 27.621        | 1.075        | 31.960        |
|      |             | Gaussian           | 0.119        | 0.004        | 29.776        | 28.670        | 1.038        | 31.043        |
|      | Broadleaved | Linear             | 0.436        | 0.011        | 26.029        | 24.464        | 1.040        | 28.081        |
|      |             | Spherical          | 0.401        | 0.011        | 26.021        | 24.426        | 1.041        | 28.068        |
|      |             | <b>Exponential</b> | <b>0.028</b> | <b>0.001</b> | <b>25.542</b> | <b>24.076</b> | <b>1.034</b> | <b>27.071</b> |
|      |             | Gaussian           | 0.494        | 0.013        | 26.954        | 24.573        | 1.035        | 29.878        |
|      | Coniferous  | Linear             | 0.127        | 0.005        | 27.275        | 25.776        | 0.981        | 28.925        |
|      |             | Spherical          | 0.124        | 0.005        | 27.156        | 25.758        | 0.976        | 28.706        |
|      |             | <b>Exponential</b> | <b>0.117</b> | <b>0.003</b> | <b>26.935</b> | <b>25.522</b> | <b>1.046</b> | <b>28.513</b> |
|      |             | Gaussian           | 0.130        | 0.004        | 27.200        | 25.906        | 0.972        | 28.657        |
|      | Mixed       | Linear             | 0.118        | 0.004        | 28.345        | 27.022        | 1.047        | 29.837        |
|      |             | <b>Spherical</b>   | <b>0.101</b> | <b>0.002</b> | <b>28.265</b> | <b>26.826</b> | <b>1.037</b> | <b>29.843</b> |
|      |             | Exponential        | 0.206        | 0.007        | 28.315        | 26.837        | 1.053        | 30.058        |
|      |             | Gaussian           | 0.175        | 0.006        | 28.284        | 26.674        | 1.058        | 30.134        |
| 2009 | All         | Linear             | 0.306        | 0.010        | 28.629        | 26.295        | 1.036        | 31.314        |
|      |             | <b>Spherical</b>   | <b>0.025</b> | <b>0.001</b> | <b>28.620</b> | <b>26.189</b> | <b>1.024</b> | <b>31.101</b> |
|      |             | Exponential        | 0.346        | 0.011        | 28.677        | 26.554        | 1.026        | 31.183        |
|      |             | Gaussian           | 0.409        | 0.012        | 28.758        | 26.793        | 0.998        | 31.146        |
|      | Broadleaved | Linear             | 0.291        | 0.007        | 25.232        | 23.610        | 1.014        | 27.166        |

|      |             |                    |              |              |               |               |              |               |
|------|-------------|--------------------|--------------|--------------|---------------|---------------|--------------|---------------|
| 2014 |             | <b>Spherical</b>   | <b>0.101</b> | <b>0.001</b> | <b>24.768</b> | <b>23.275</b> | <b>1.001</b> | <b>26.363</b> |
|      |             | Exponential        | 0.251        | 0.006        | 25.148        | 23.571        | 1.013        | 26.996        |
|      |             | Gaussian           | 0.204        | 0.005        | 25.139        | 23.731        | 1.009        | 26.765        |
|      |             |                    |              |              |               |               |              |               |
|      | Coniferous  | Linear             | 0.071        | 0.002        | 26.976        | 26.369        | 0.949        | 27.707        |
|      |             | Spherical          | 0.029        | 0.001        | 26.742        | 26.176        | 0.952        | 27.386        |
|      |             | <b>Exponential</b> | <b>0.027</b> | <b>0.001</b> | <b>25.914</b> | <b>24.625</b> | <b>0.907</b> | <b>27.325</b> |
|      |             | Gaussian           | 0.062        | 0.003        | 26.984        | 26.256        | 0.952        | 27.825        |
|      | Mixed       | Linear             | 0.324        | 0.011        | 27.420        | 26.573        | 1.020        | 28.622        |
|      |             | <b>Spherical</b>   | <b>0.124</b> | <b>0.005</b> | <b>27.256</b> | <b>26.425</b> | <b>1.012</b> | <b>28.229</b> |
|      |             | Exponential        | 0.181        | 0.007        | 27.531        | 26.591        | 1.016        | 28.675        |
|      |             | Gaussian           | 0.242        | 0.005        | 27.836        | 26.625        | 1.015        | 29.309        |
|      | All         | Linear             | 0.173        | 0.005        | 30.539        | 28.381        | 1.020        | 32.896        |
|      |             | <b>Spherical</b>   | <b>0.162</b> | <b>0.005</b> | <b>30.385</b> | <b>28.167</b> | <b>1.058</b> | <b>32.828</b> |
|      |             | Exponential        | 0.188        | 0.006        | 30.769        | 28.601        | 1.011        | 33.142        |
|      |             | Gaussian           | 0.211        | 0.006        | 30.619        | 28.621        | 1.099        | 32.934        |
|      | Broadleaved | Linear             | 0.326        | 0.008        | 28.669        | 26.846        | 0.946        | 30.880        |
|      |             | Spherical          | 0.297        | 0.007        | 28.611        | 26.835        | 0.946        | 30.745        |
|      |             | <b>Exponential</b> | <b>0.034</b> | <b>0.001</b> | <b>28.115</b> | <b>26.549</b> | <b>0.902</b> | <b>29.814</b> |
|      |             | Gaussian           | 0.335        | 0.008        | 28.687        | 26.848        | 0.947        | 30.922        |
|      | Coniferous  | Linear             | 0.091        | 0.006        | 29.179        | 26.900        | 0.965        | 31.590        |
|      |             | Spherical          | 0.068        | 0.005        | 28.806        | 26.088        | 0.967        | 31.630        |
|      |             | <b>Exponential</b> | <b>0.057</b> | <b>0.004</b> | <b>28.569</b> | <b>26.062</b> | <b>0.904</b> | <b>31.232</b> |
|      |             | Gaussian           | 0.177        | 0.007        | 29.156        | 26.887        | 0.964        | 31.644        |
|      | Mixed       | Linear             | 0.129        | 0.004        | 29.774        | 27.903        | 1.045        | 31.823        |
|      |             | Spherical          | 0.128        | 0.004        | 29.797        | 27.991        | 1.047        | 31.781        |
|      |             | <b>Exponential</b> | <b>0.104</b> | <b>0.002</b> | <b>29.685</b> | <b>27.865</b> | <b>1.032</b> | <b>31.643</b> |
|      |             | Gaussian           | 0.119        | 0.004        | 29.908        | 28.043        | 1.049        | 31.945        |

Note: Results of all forest plots with no classification of forest type are abbreviated as “All”. The bold type in the table is the best model and parameter. ME, Mean Error; MSE, Mean Standardized Error; RMSSE, Root-mean-Square Standardized Error; ASE, Average Standard Error; TE, Total Error; RMSE, Root Mean Square Error.

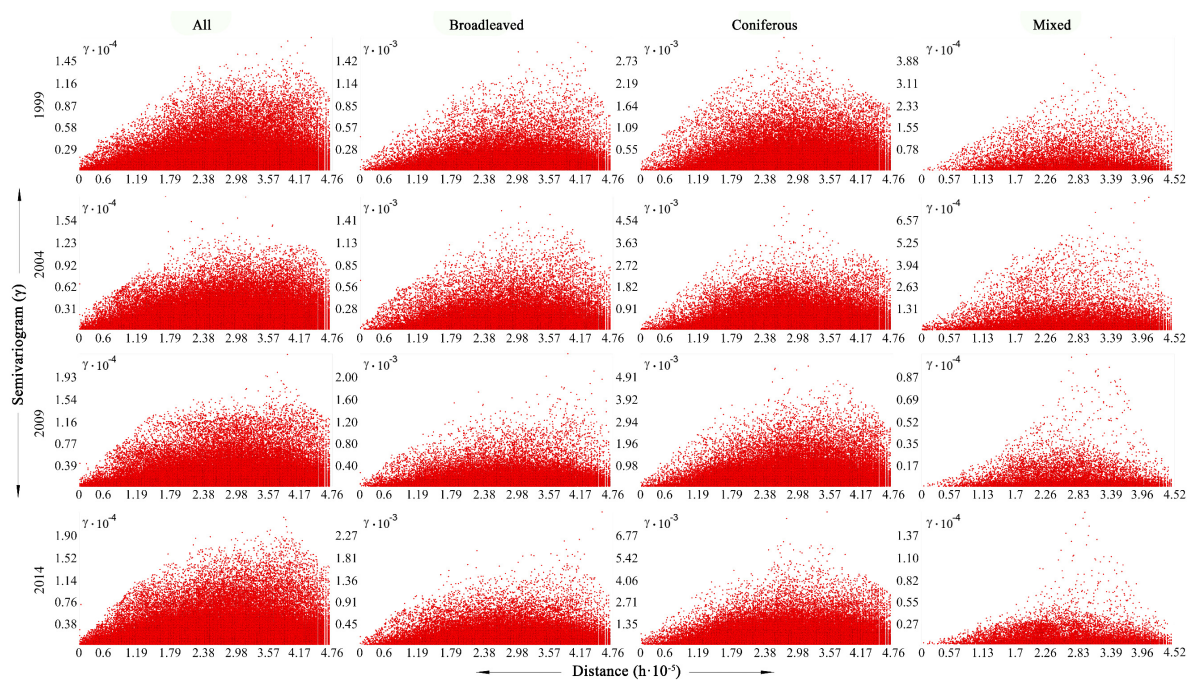

**Figure S1.** The Semivariogram cloud for different forest types of XGBoost models. All: Results of all forest plots with no classification of forest type; Combined: combined with their respective results of broadleaved, coniferous, and mixed forest.

**Table S6.** Correlation coefficient between the climate predictor variables and AGB.

| Variable Name | AGB   | Bio01 | Bio02 | Bio03 | Bio04 | Bio05 | Bio06 | Bio07 | Bio08 | Bio09 | Bio10 | Bio11 | Bio12 | Bio13 | Bio14 | Bio15 | Bio16 | Bio17 | Bio18 |
|---------------|-------|-------|-------|-------|-------|-------|-------|-------|-------|-------|-------|-------|-------|-------|-------|-------|-------|-------|-------|
| Bio01         | -0.50 | 1     |       |       |       |       |       |       |       |       |       |       |       |       |       |       |       |       |       |
| Bio02         | -0.42 | 0.16  | 1     |       |       |       |       |       |       |       |       |       |       |       |       |       |       |       |       |
| Bio03         | -0.26 | -0.30 | 0.47  | 1     |       |       |       |       |       |       |       |       |       |       |       |       |       |       |       |
| Bio04         | -0.29 | 0.49  | 0.47  | -0.73 | 1     |       |       |       |       |       |       |       |       |       |       |       |       |       |       |
| Bio05         | -0.44 | 0.87  | 0.33  | -0.64 | 0.83  | 1     |       |       |       |       |       |       |       |       |       |       |       |       |       |
| Bio06         | -0.62 | 0.86  | -0.34 | -0.16 | 0.27  | 0.66  | 1     |       |       |       |       |       |       |       |       |       |       |       |       |
| Bio07         | -0.12 | 0.31  | 0.53  | -0.90 | 0.83  | 0.69  | -0.15 | 1     |       |       |       |       |       |       |       |       |       |       |       |
| Bio08         | -0.47 | 0.98  | 0.17  | -0.32 | 0.56  | 0.86  | 0.84  | 0.33  | 1     |       |       |       |       |       |       |       |       |       |       |
| Bio09         | -0.47 | 0.95  | -0.20 | -0.22 | 0.27  | 0.72  | 0.91  | 0.14  | 0.93  | 1     |       |       |       |       |       |       |       |       |       |
| Bio10         | -0.49 | 0.95  | 0.25  | -0.51 | 0.72  | 0.96  | 0.73  | 0.54  | 0.93  | 0.82  | 1     |       |       |       |       |       |       |       |       |
| Bio11         | -0.46 | 0.94  | 0.11  | -0.13 | 0.24  | 0.72  | 0.83  | 0.19  | 0.88  | 0.92  | 0.85  | 1     |       |       |       |       |       |       |       |
| Bio12         | 0.23  | -0.62 | -0.41 | 0.65  | -0.67 | -0.79 | -0.27 | -0.73 | -0.60 | -0.41 | -0.75 | -0.58 | 1     |       |       |       |       |       |       |
| Bio13         | 0.41  | -0.48 | -0.42 | 0.40  | -0.77 | -0.76 | -0.48 | -0.51 | -0.70 | -0.49 | -0.74 | -0.43 | 0.64  | 1     |       |       |       |       |       |
| Bio14         | 0.18  | 0.17  | 0.15  | -0.73 | 0.57  | 0.36  | -0.28 | 0.69  | 0.17  | -0.12 | 0.23  | -0.19 | -0.56 | -0.31 | 1     |       |       |       |       |
| Bio15         | -0.14 | -0.24 | -0.29 | 0.74  | -0.77 | -0.53 | 0.10  | -0.76 | -0.34 | -0.10 | -0.42 | 0.11  | 0.64  | 0.54  | -0.88 | 1     |       |       |       |
| Bio16         | 0.29  | -0.57 | -0.60 | 0.52  | -0.79 | -0.78 | -0.30 | -0.70 | -0.57 | -0.32 | -0.75 | -0.44 | 0.86  | 0.81  | -0.42 | 0.65  | 1     |       |       |
| Bio17         | 0.29  | -0.21 | -0.42 | -0.56 | 0.39  | 0.13  | -0.30 | 0.44  | -0.17 | -0.24 | -0.10 | -0.34 | -0.22 | -0.16 | 0.76  | -0.72 | -0.18 | 1     |       |
| Bio18         | -0.16 | -0.43 | -0.16 | 0.78  | -0.62 | -0.62 | -0.14 | -0.73 | -0.46 | -0.29 | -0.54 | -0.31 | 0.85  | 0.43  | -0.85 | 0.81  | 0.56  | -0.54 | 1     |
| Bio19         | 0.29  | -0.14 | -0.28 | -0.50 | 0.42  | 0.16  | -0.21 | 0.35  | 0.15  | -0.16 | 0.12  | -0.30 | -0.17 | -0.29 | 0.69  | -0.68 | -0.10 | 0.46  | -0.46 |

Note: All variables had a significance level of 0.01 with other variables.



## References

1. Kaufman, Y.J.; Tanre, D. Atmospherically resistant vegetation index (ARVI) for EOS-MODIS. *IEEE Trans. Geosci. Remote Sens.* **1992**, *30*, 261–270.
2. Tucker, C.J. Red and photographic infrared linear combinations for monitoring vegetation. *Remote Sens. Environ.* **1979**, *8*, 127–150.
3. Huete, A.; Didan, K.; Miura, T.; Rodriguez, E.; Gao, X.; Ferreira, L.. Overview of the radiometric and biophysical performance of the MODIS vegetation indices. *Remote Sens. Environ.* **2002**, *83*, 195–213.
4. Gitelson, A.A.; Kaufman, Y.J.; Merzlyak, M.N. Use of a green channel in remote sensing of global vegetation from EOS-MODIS. *Remote Sens. Environ.* **1996**, *58*, 289–298.
5. Sripada, R.P.; Heiniger, R.W.; White, J.G.; Meijer, A.D. Aerial Color Infrared Photography for Determining Early In-Season Nitrogen Requirements in Corn. *Agron. J.* **2006**, *98*, 968.
6. Gitelson, A.A.; Merzlyak, M.N. Remote sensing of chlorophyll concentration in higher plant leaves. *Adv. Sp. Res.* **1998**, *22*, 689–692.
7. Kauth, R.J. Tasseled Cap - a Graphic Description of the Spectral-Temporal Development of Agricultural Crops As Seen By Landsat. **1976**, 41–51.
8. Crippen, R. Calculating the vegetation index faster. *Remote Sens. Environ.* **1990**, *34*, 71–73.
9. Boegh, E.; Soegaard, H.; Broge, N.; Hasager, C.B.; Jensen, N.O.; Schelde, K.; Thomsen, A. Airborne multispectral data for quantifying leaf area index, nitrogen concentration, and photosynthetic efficiency in agriculture. *Remote Sens. Environ.* **2002**, *81*, 179–193.
10. Yang, Z.; Willis, P.; Mueller, R. Impact of Band-Ratio Enhanced AWIFS Image to Crop Classification Accuracy. *J. Am. Chem. Soc.* **2014**, *136*, 16132–16135.
11. Chen, J.M. Evaluation of Vegetation Indices and a Modified Simple Ratio for Boreal Applications. *Can. J. Remote Sens.* **1996**, *22*, 229–242.
12. Goel, N.S.; Qin, W. Influences of canopy architecture on relationships between various vegetation indices and LAI and FPAR: a computer simulation. *Remote Sens. Rev.* **1994**, *10*, 309–347.
13. Rouse, W.; Haas, H.; Deering, W. Monitoring Vegetation Systems in the Great Plains With ERTS. In Proceedings of the Third Earth Resources Technology Satellite-1 Symposium; NASA: Washington, USA, 1973; pp. 309–317.
14. Rondeaux, G.; Steven, M.; Baret, F. Optimization of soil-adjusted vegetation indices. *Remote Sens. Environ.* **1996**, *55*, 95–107.
15. Birth, G.S.; McVey, G.R. Measuring the Color of Growing Turf with a Reflectance Spectrophotometer1. *Agron. J.* **1968**, *60*, 640.
16. Huete, A.. A soil-adjusted vegetation index (SAVI). *Remote Sens. Environ.* **1988**, *25*, 295–309.
17. Bannari, A.; Asalhi, H.; Teillet, P.M. Transformed difference vegetation index (TDVI) for vegetation cover mapping. In Proceedings of the IEEE International Geoscience and Remote Sensing Symposium; IEEE, 2002; Vol. 5, pp. 3053–3055.
18. Gitelson, A.A.; Stark, R.; Grits, U.; Rundquist, D.; Kaufman, Y.; Derry, D. Vegetation and soil lines in visible spectral space: A concept and technique for remote estimation of vegetation fraction. *Int. J. Remote Sens.* **2002**, *23*, 2537–2562.
19. Robertson G P. GS+: GeoStatistics for the Environmental Sciences[M]. Plainwell, USA: Gamma Design Software, **2008**.
20. ESRI. ArcGIS Help 10.2: Cross Validation (Geostatistical Analyst)[EB/OL]. <http://resources.arcgis.com/en/help/main/10.2/#/na/003000000000z0000000/>, 2014-03-07.
